# Supplementary material
Source: PubMed Central journal article supplement (PMC5614844)
Supplement: NIHMS894879-supplement.pdf [file NIHMS894879-supplement.pdf]

## Supplemental Information

Table I: **Method Comparison:** Mean (standard deviation) of the Dice Similarity Coefficient (DSC), Hausdorff Distance (HD), and mean surface distance (MSD) for the left and right thalamus validated against Rater #1 and Rater #2. Compared are FreeSurfer (Fischl et al., 2002), FSL FIRST (Patenaude et al., 2011), Non-Local Spatial STAPLE (Asman and Landman, 2013) using either the Neuromorphometrics atlas (NMM-NLSS) or our own thalamus atlas set (MA-NLSS). The \* and † indicate a statistically significant difference between the algorithm and RAFTS with  $p < 0.05$  and  $p < 0.01$ , respectively.

|                 |                 | Ground Truth Rater #1              |                                    | Ground Truth Rater #2              |                                    |
|-----------------|-----------------|------------------------------------|------------------------------------|------------------------------------|------------------------------------|
|                 |                 | Left                               | Right                              | Left                               | Right                              |
| DSC             | FreeSurfer      | 0.799 ( $\pm 0.057$ ) <sup>†</sup> | 0.823 ( $\pm 0.024$ ) <sup>†</sup> | 0.747 ( $\pm 0.063$ ) <sup>†</sup> | 0.755 ( $\pm 0.047$ ) <sup>†</sup> |
|                 | FSL FIRST       | 0.821 ( $\pm 0.031$ )*             | 0.843 ( $\pm 0.027$ ) <sup>†</sup> | 0.776 ( $\pm 0.038$ )*             | 0.785 ( $\pm 0.034$ ) <sup>†</sup> |
|                 | NMM-NLSS        | 0.795 ( $\pm 0.028$ ) <sup>†</sup> | 0.797 ( $\pm 0.035$ ) <sup>†</sup> | 0.736 ( $\pm 0.049$ ) <sup>†</sup> | 0.739 ( $\pm 0.062$ ) <sup>†</sup> |
|                 | MA-NLSS         | 0.859 ( $\pm 0.057$ )*             | 0.874 ( $\pm 0.016$ ) <sup>†</sup> | 0.787 ( $\pm 0.058$ ) <sup>†</sup> | 0.811 ( $\pm 0.036$ )*             |
|                 | RAFTS w/o Prior | 0.842 ( $\pm 0.028$ ) <sup>†</sup> | 0.816 ( $\pm 0.047$ ) <sup>†</sup> | 0.794 ( $\pm 0.031$ )*             | 0.730 ( $\pm 0.069$ ) <sup>†</sup> |
|                 | RAFTS w/o DTI   | 0.841 ( $\pm 0.041$ )*             | 0.825 ( $\pm 0.046$ ) <sup>†</sup> | 0.775 ( $\pm 0.026$ ) <sup>†</sup> | 0.740 ( $\pm 0.064$ ) <sup>†</sup> |
|                 | RAFTS           | <b>0.882</b> ( $\pm 0.033$ )       | <b>0.890</b> ( $\pm 0.013$ )       | <b>0.818</b> ( $\pm 0.052$ )       | <b>0.827</b> ( $\pm 0.041$ )       |
| HD<br>(voxels)  | FreeSurfer      | 10.79 ( $\pm 2.63$ ) <sup>†</sup>  | 10.50 ( $\pm 1.75$ ) <sup>†</sup>  | 10.63 ( $\pm 2.14$ ) <sup>†</sup>  | 10.85 ( $\pm 1.80$ ) <sup>†</sup>  |
|                 | FSL FIRST       | 10.94 ( $\pm 1.22$ ) <sup>†</sup>  | 11.62 ( $\pm 1.75$ ) <sup>†</sup>  | 11.01 ( $\pm 0.85$ ) <sup>†</sup>  | 11.39 ( $\pm 0.84$ ) <sup>†</sup>  |
|                 | NMM-NLSS        | 10.75 ( $\pm 3.44$ ) <sup>†</sup>  | 10.58 ( $\pm 1.79$ ) <sup>†</sup>  | 10.45 ( $\pm 3.07$ ) <sup>†</sup>  | 10.28 ( $\pm 1.41$ ) <sup>†</sup>  |
|                 | MA-NLSS         | 5.61 ( $\pm 1.85$ ) <sup>†</sup>   | 6.43 ( $\pm 2.58$ )*               | 10.79 ( $\pm 2.63$ ) <sup>†</sup>  | 10.50 ( $\pm 1.75$ ) <sup>†</sup>  |
|                 | RAFTS w/o Prior | 5.26 ( $\pm 1.46$ ) <sup>†</sup>   | 5.94 ( $\pm 1.55$ ) <sup>†</sup>   | 7.73 ( $\pm 0.83$ )                | 8.48 ( $\pm 2.11$ ) <sup>†</sup>   |
|                 | RAFTS w/o DTI   | 5.05 ( $\pm 1.20$ )*               | 4.93 ( $\pm 0.78$ )*               | 7.83 ( $\pm 1.27$ )                | 7.30 ( $\pm 2.19$ )                |
|                 | RAFTS           | <b>4.05</b> ( $\pm 1.07$ )         | <b>4.23</b> ( $\pm 0.79$ )         | <b>7.07</b> ( $\pm 1.24$ )         | <b>7.04</b> ( $\pm 1.75$ )         |
| MSD<br>(voxels) | FreeSurfer      | 1.410 ( $\pm 0.300$ ) <sup>†</sup> | 1.296 ( $\pm 0.111$ ) <sup>†</sup> | 1.729 ( $\pm 0.333$ ) <sup>†</sup> | 1.722 ( $\pm 0.272$ ) <sup>†</sup> |
|                 | FSL FIRST       | 1.456 ( $\pm 0.201$ ) <sup>†</sup> | 1.333 ( $\pm 0.158$ ) <sup>†</sup> | 1.769 ( $\pm 0.193$ ) <sup>†</sup> | 1.751 ( $\pm 0.215$ ) <sup>†</sup> |
|                 | NMM-NLSS        | 1.578 ( $\pm 0.166$ ) <sup>†</sup> | 1.575 ( $\pm 0.169$ ) <sup>†</sup> | 1.986 ( $\pm 0.221$ ) <sup>†</sup> | 1.996 ( $\pm 0.355$ ) <sup>†</sup> |
|                 | MA-NLSS         | 0.895 ( $\pm 0.289$ )              | 0.856 ( $\pm 0.061$ ) <sup>†</sup> | 1.322 ( $\pm 0.267$ )              | 1.248 ( $\pm 0.142$ )              |
|                 | RAFTS w/o Prior | 1.079 ( $\pm 0.183$ ) <sup>†</sup> | 1.294 ( $\pm 0.328$ ) <sup>†</sup> | 1.378 ( $\pm 0.156$ )              | 1.840 ( $\pm 0.382$ ) <sup>†</sup> |
|                 | RAFTS w/o DTI   | 1.101 ( $\pm 0.294$ )*             | 1.236 ( $\pm 0.336$ ) <sup>†</sup> | 1.526 ( $\pm 0.162$ )*             | 1.800 ( $\pm 0.376$ ) <sup>†</sup> |
|                 | RAFTS           | <b>0.829</b> ( $\pm 0.174$ )       | <b>0.802</b> ( $\pm 0.054$ )       | <b>1.236</b> ( $\pm 0.259$ )       | <b>1.219</b> ( $\pm 0.209$ )       |
